# Supplementary material
Source: publisher site journal article supplement (https://www.dovepress.com/article/179301)

## Supplementary material: Summary of findings; diabetes distress

| Certainty assessment                                                                            |                   |                           |               |              |                      |                      | № of patients              |               | Effect            |                                              | Certainty                                                                                       | Importance |
|-------------------------------------------------------------------------------------------------|-------------------|---------------------------|---------------|--------------|----------------------|----------------------|----------------------------|---------------|-------------------|----------------------------------------------|-------------------------------------------------------------------------------------------------|------------|
| № of studies                                                                                    | Study design      | Risk of bias              | Inconsistency | Indirectness | Imprecision          | Other considerations | psychosocial interventions | standard care | Relative (95% CI) | Absolute (95% CI)                            |                                                                                                 |            |
| Diabetes distress at 3, 6, 12 and 24 months follow-up - Diabetes Distress at 3 months follow-up |                   |                           |               |              |                      |                      |                            |               |                   |                                              |                                                                                                 |            |
| 7                                                                                               | randomised trials | not serious <sup>a</sup>  | not serious   | serious      | serious <sup>d</sup> | none                 | 389                        | 349           | -                 | SMD 0.18 lower<br>(0.32 lower to 0.03 lower) | <br>LOW      |            |
| Diabetes distress at 6, 12 and 24 months follow-up - Diabetes distress at 6 months              |                   |                           |               |              |                      |                      |                            |               |                   |                                              |                                                                                                 |            |
| 8                                                                                               | randomised trials | serious <sup>a</sup>      | not serious   | not serious  | not serious          | none                 | 620                        | 613           | -                 | SMD 0.19 lower<br>(0.31 lower to 0.07 lower) | <br>MODERATE |            |
| Diabetes distress at 6, 12 and 24 months follow-up - Diabetes distress at 12 months             |                   |                           |               |              |                      |                      |                            |               |                   |                                              |                                                                                                 |            |
| 6                                                                                               | randomised trials | serious <sup>b</sup>      | not serious   | not serious  | not serious          | none                 | 791                        | 411           | -                 | SMD 0.22 lower<br>(0.39 lower to 0.04 lower) | <br>MODERATE |            |
| Diabetes distress at 6, 12 and 24 months follow-up - Diabetes distress at 24 months follow-up   |                   |                           |               |              |                      |                      |                            |               |                   |                                              |                                                                                                 |            |
| 2                                                                                               | randomised trials | very serious <sup>c</sup> | not serious   | not serious  | not serious          | none                 | 306                        | 357           | -                 | SMD 0.21 lower<br>(0.36 lower to 0.05 lower) | <br>LOW    |            |

CI: Confidence interval; MD: Mean difference; SMD: Standardised mean difference

## Explanations

- Due to high risk and unclear ratings on selective reporting
- Many unclear ratings and high risk on blinded outcome assessor and selective reporting.
- In the study of Gabbay et al (2013) patients in the intervention group that for some reason did not receive the intervention, were added to the control group and due to high risk of attrition bias.
- In all, but one study (Beverly et al 2013), the upper and lower Ci crosses an effect size of 0.5

## Supplementary material: Summary of findings; HbA1c

| Certainty assessment                                                    |                   |                           |                      |              |                      |                      | № of patients              |               | Effect            |                                            | Certainty                                                                                       | Importance |
|-------------------------------------------------------------------------|-------------------|---------------------------|----------------------|--------------|----------------------|----------------------|----------------------------|---------------|-------------------|--------------------------------------------|-------------------------------------------------------------------------------------------------|------------|
| № of studies                                                            | Study design      | Risk of bias              | Inconsistency        | Indirectness | Imprecision          | Other considerations | psychosocial interventions | standard care | Relative (95% CI) | Absolute (95% CI)                          |                                                                                                 |            |
| HbA1c at 3, 6, 12 and 24 months follow-up - HbA1c at 3 months follow-up |                   |                           |                      |              |                      |                      |                            |               |                   |                                            |                                                                                                 |            |
| 6                                                                       | randomised trials | not serious               | not serious          | serious      | serious <sup>a</sup> | none                 | 345                        | 317           | -                 | MD 0.17 lower (0.41 lower to 0.06 higher)  | <br>LOW      |            |
| HbA1c at 6, 12 and 24 months follow-up - HbA1c at 6 months follow-up    |                   |                           |                      |              |                      |                      |                            |               |                   |                                            |                                                                                                 |            |
| 9                                                                       | randomised trials | serious <sup>b</sup>      | serious <sup>c</sup> | not serious  | serious <sup>a</sup> | none                 | 848                        | 823           | -                 | MD 0.27 lower (0.6 lower to 0.06 higher)   | <br>VERY LOW |            |
| HbA1c at 6, 12 and 24 months follow-up - HbA1c at 12 months follow-up   |                   |                           |                      |              |                      |                      |                            |               |                   |                                            |                                                                                                 |            |
| 7                                                                       | randomised trials | not serious <sup>d</sup>  | not serious          | not serious  | serious <sup>e</sup> | none                 | 977                        | 604           |                   | MD 0.02 higher (0.17 lower to 0.22 higher) | <br>MODERATE |            |
| HbA1c at 6, 12 and 24 months follow-up - HbA1c at 24 months follow-up   |                   |                           |                      |              |                      |                      |                            |               |                   |                                            |                                                                                                 |            |
| 2                                                                       | randomised trials | very serious <sup>f</sup> | not serious          | not serious  | not serious          | none                 | 310                        | 359           | -                 | MD 0.23 lower (0.5 lower to 0.04 higher)   | <br>LOW    |            |

CI: Confidence interval; MD: Mean difference; SMD: Standardised mean difference

## Explanations

- In all included studies, the upper or lower CI crosses an effect size of 0.5.
- Due to high risk and unclear ratings on selective reporting
- High heterogeneity of 79%, which the authors judged were primarily caused by diversity of interventions and CIs not overlapping
- Many unclear ratings and high risk on blinded outcome assessor and selective reporting.
- Due to low sample size in studies by D'Erano 2010 and McEwen 2017 and consequently wide CIs
- In the study of Gabbay et al (2013) patients in the intervention group that for some reason did not receive the intervention, were added to the control group and due to high risk of attrition bias.

Supplementary material: Subgroup analyses: Diabetes distress

Figure 3a: Subgroup analysis 1) Effect of brief (≤4 sessions) versus Intensive (>4 sessions) on DD at longest follow-up

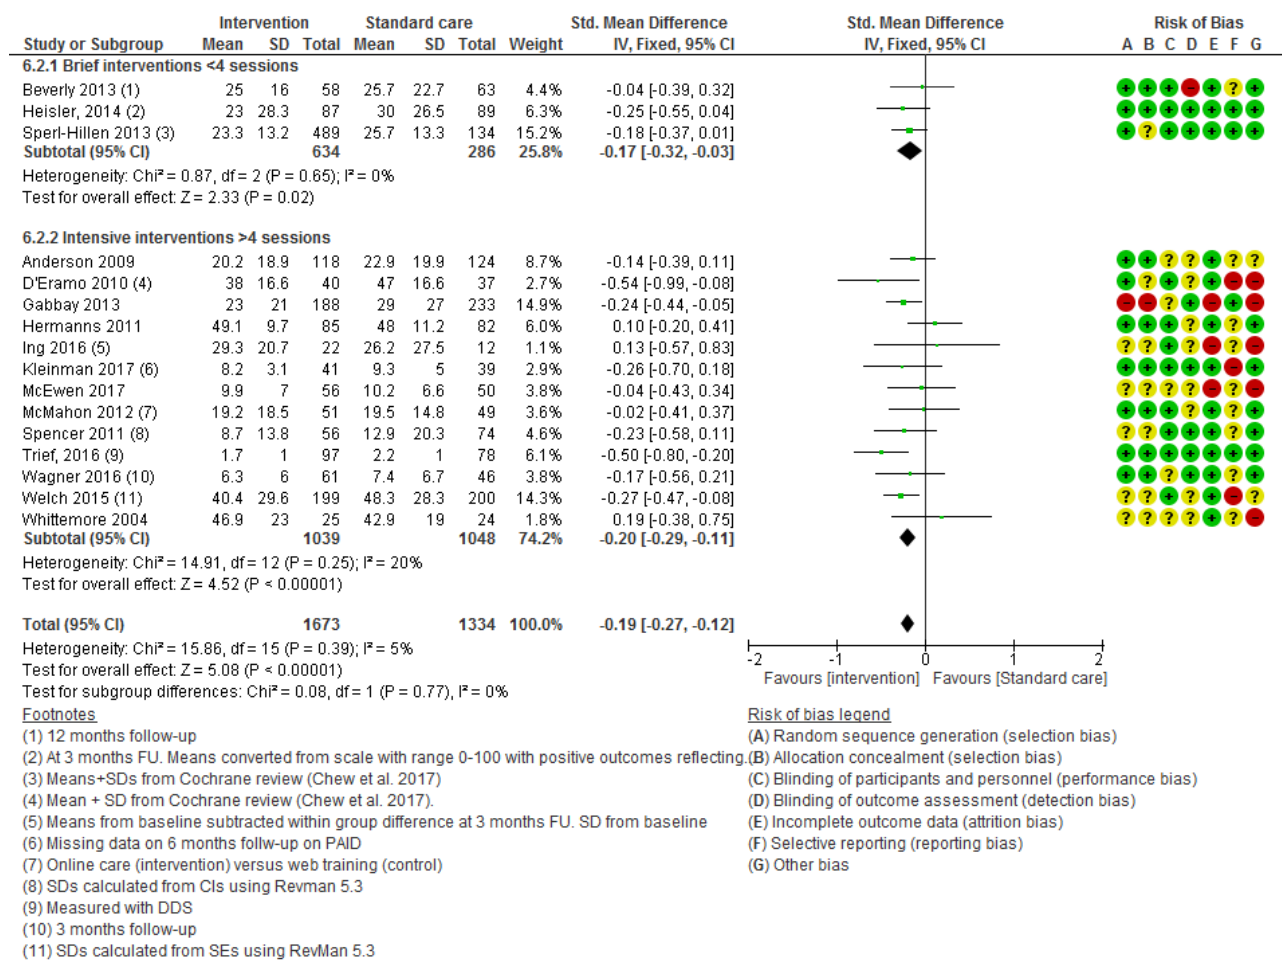

Figure 3b: Individual versus group interventions on DD at longest follow-up

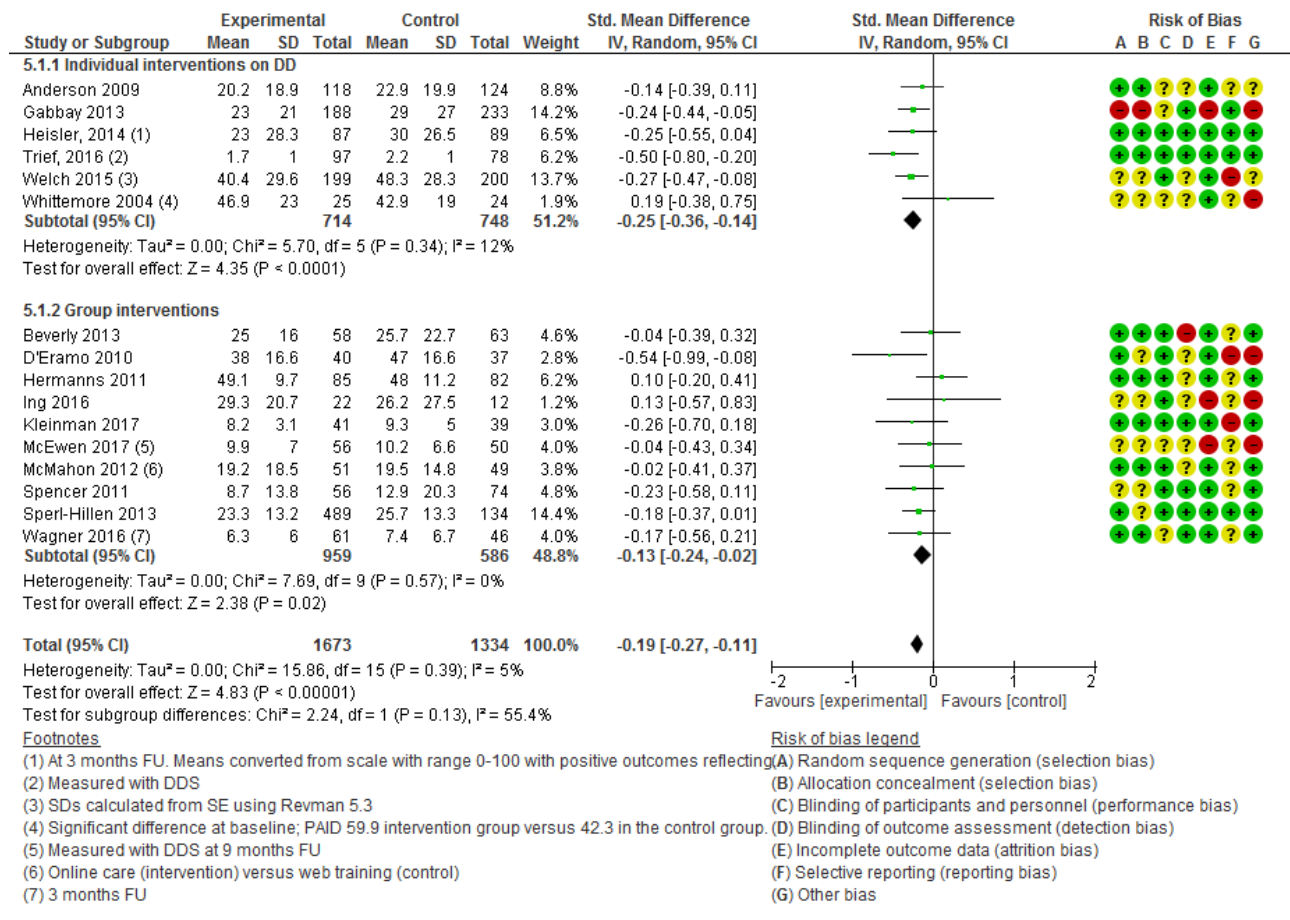

Figure 3c: Motivational interviewing versus standard care on DD at longest follow-up

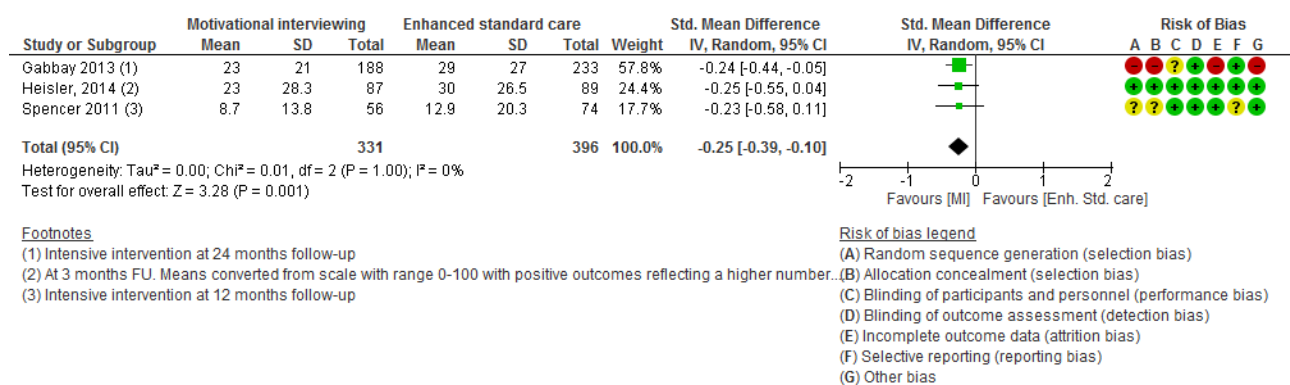

Supplementary material: Subgroup analyses: HbA1c

Figure 4a) Effect of brief ( $\leq 4$  sessions) versus Intensive ( $>4$  sessions) on HbA1c at longest follow-up

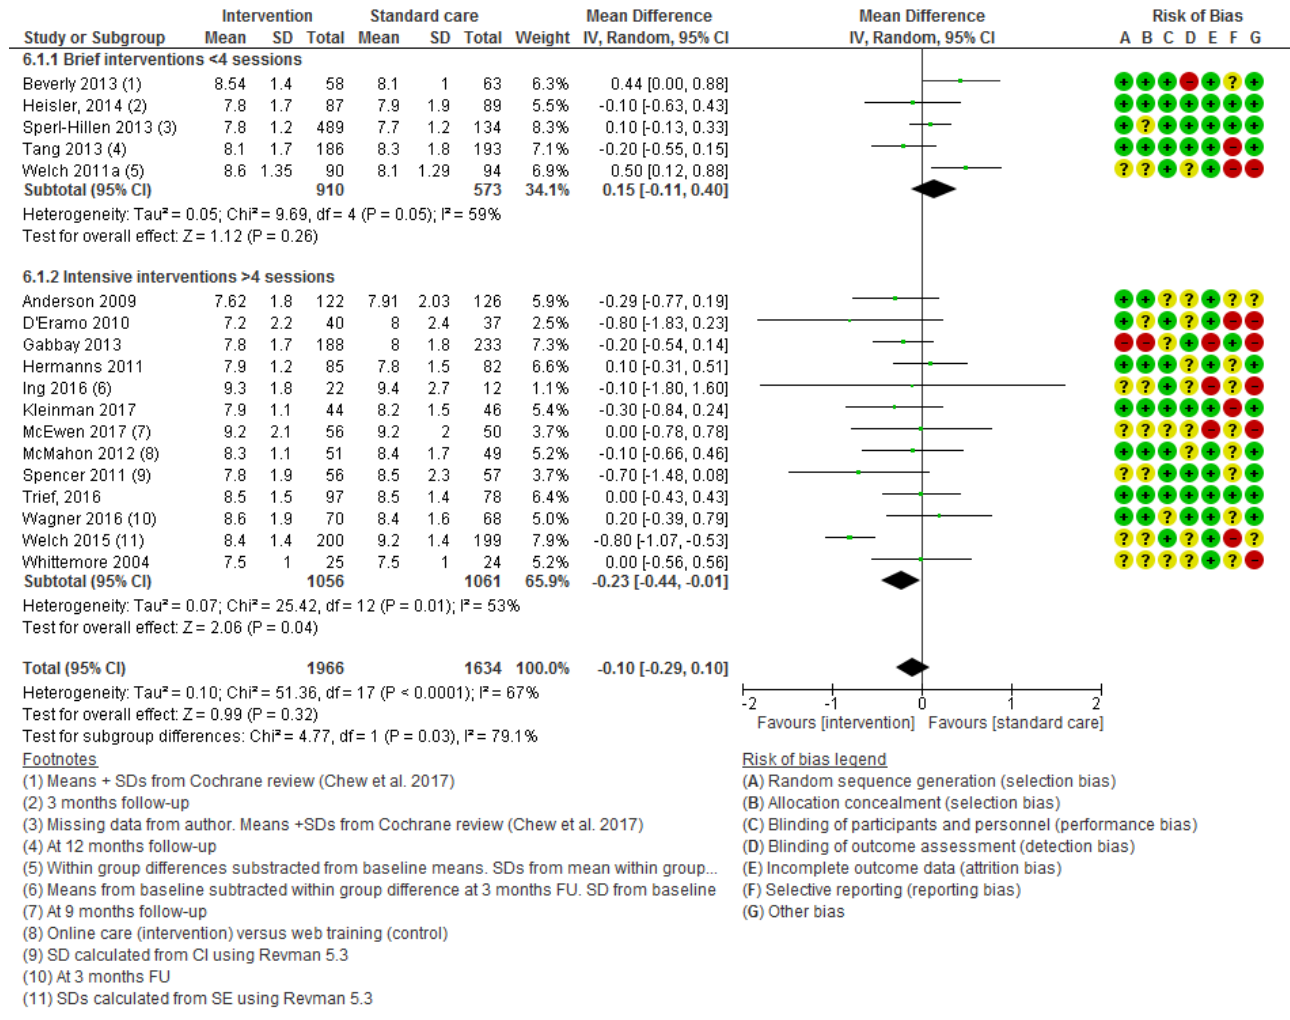

Figure 4b) Individual versus group interventions on HbA1c at longest follow-up

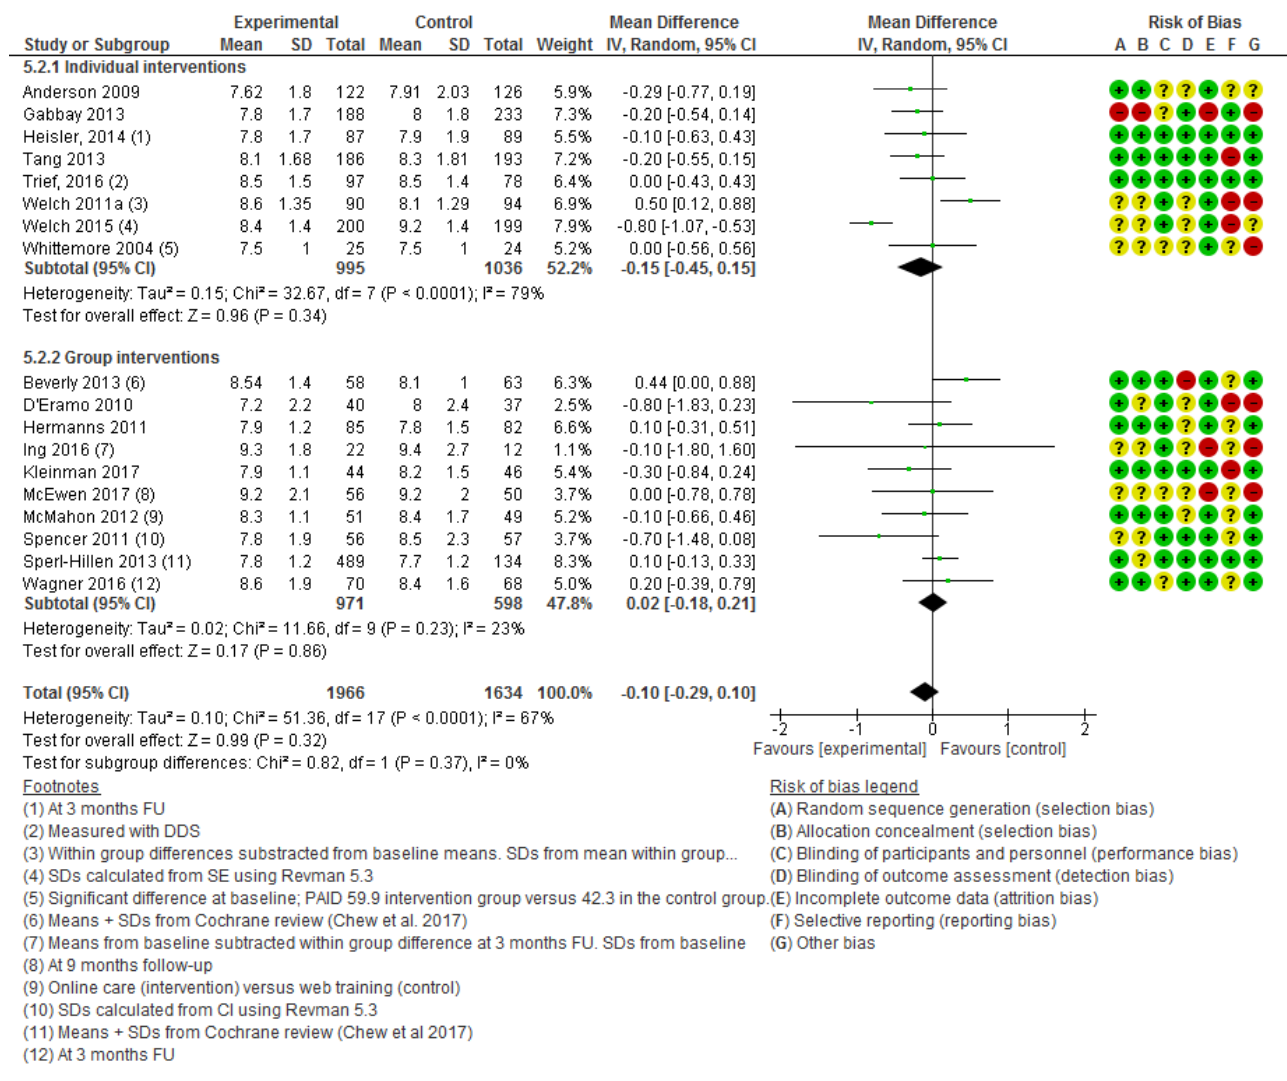

Figure 4c) Motivational interviewing versus standard care on HbA1 at longest follow-up

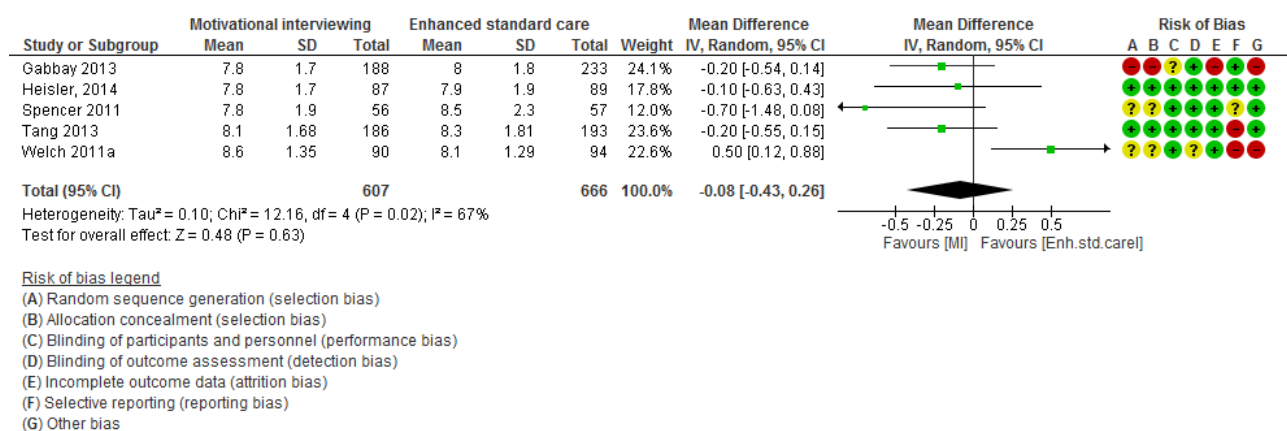

Supplement: Supplementary file 1 [file get_supplementary_file.php]
